# Supplementary material for: Heat-Inactivated Akkermansia muciniphila Improves Gut Permeability but Does Not Prevent Development of Non-Alcoholic Steatohepatitis in Diet-Induced Obese Ldlr−/−.Leiden Mice
Source: MDPI journal article supplement (doi:10.3390/ijms23042325), 2022-02-19
Supplement: s1 [file s1]

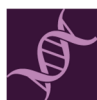

Supplementary Material

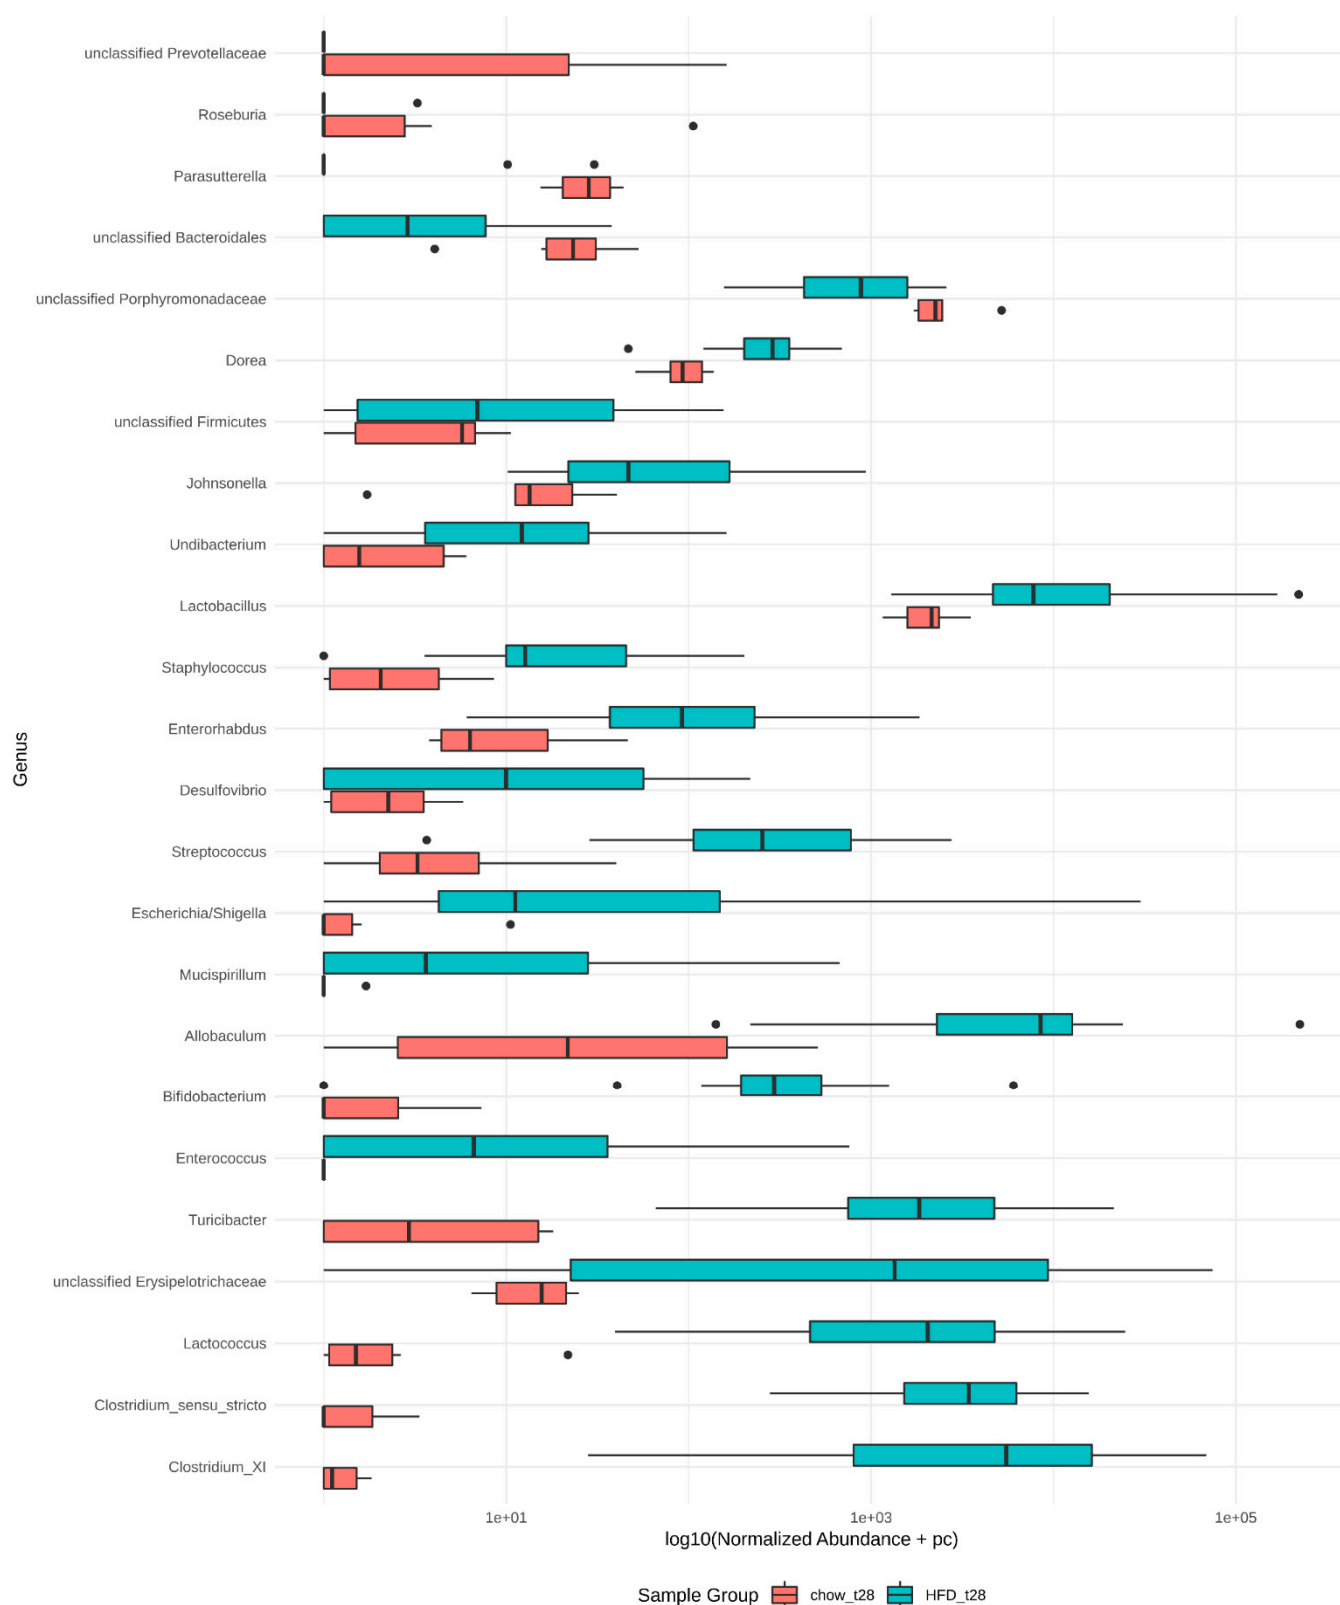

**Figure S1.** Significantly altered genera in ileum mucosa in HFD relative to chow-fed mice. *Ldlr*<sup>-/-</sup>.Leiden mice were fed a chow reference diet (Chow) or a NASH-inducing high-fat diet for 28 weeks. Graph shows the abundance of genera that were significantly altered by HFD feeding relative to chow.

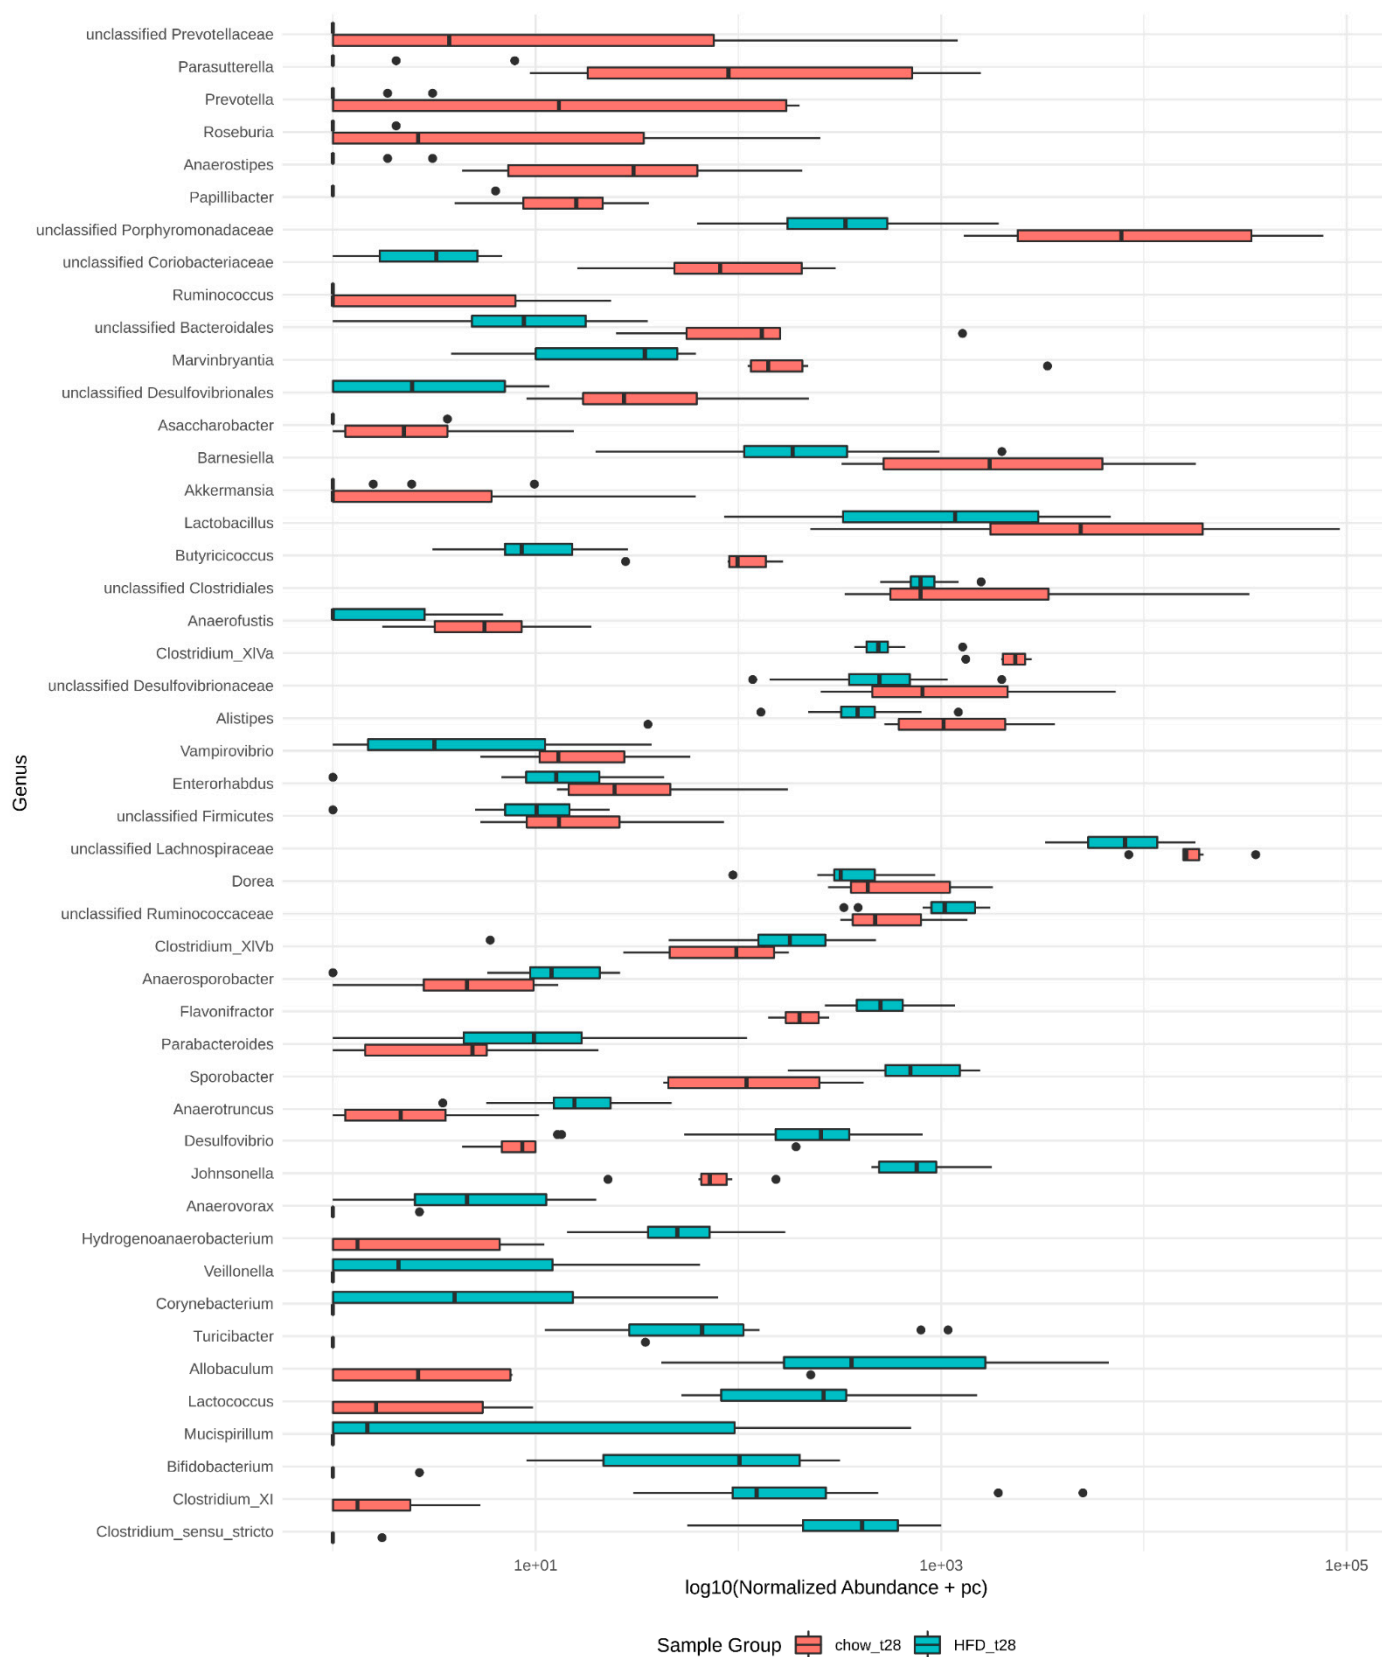

**Figure S2.** Significantly altered genera in colon mucosa in HFD relative to chow-fed mice. *Ldlr*<sup>-/-</sup>.Leiden mice were fed a chow reference diet (Chow) or a NASH-inducing high-fat diet for 28 weeks. Graph shows the abundance of genera that were significantly altered by HFD feeding relative to chow.

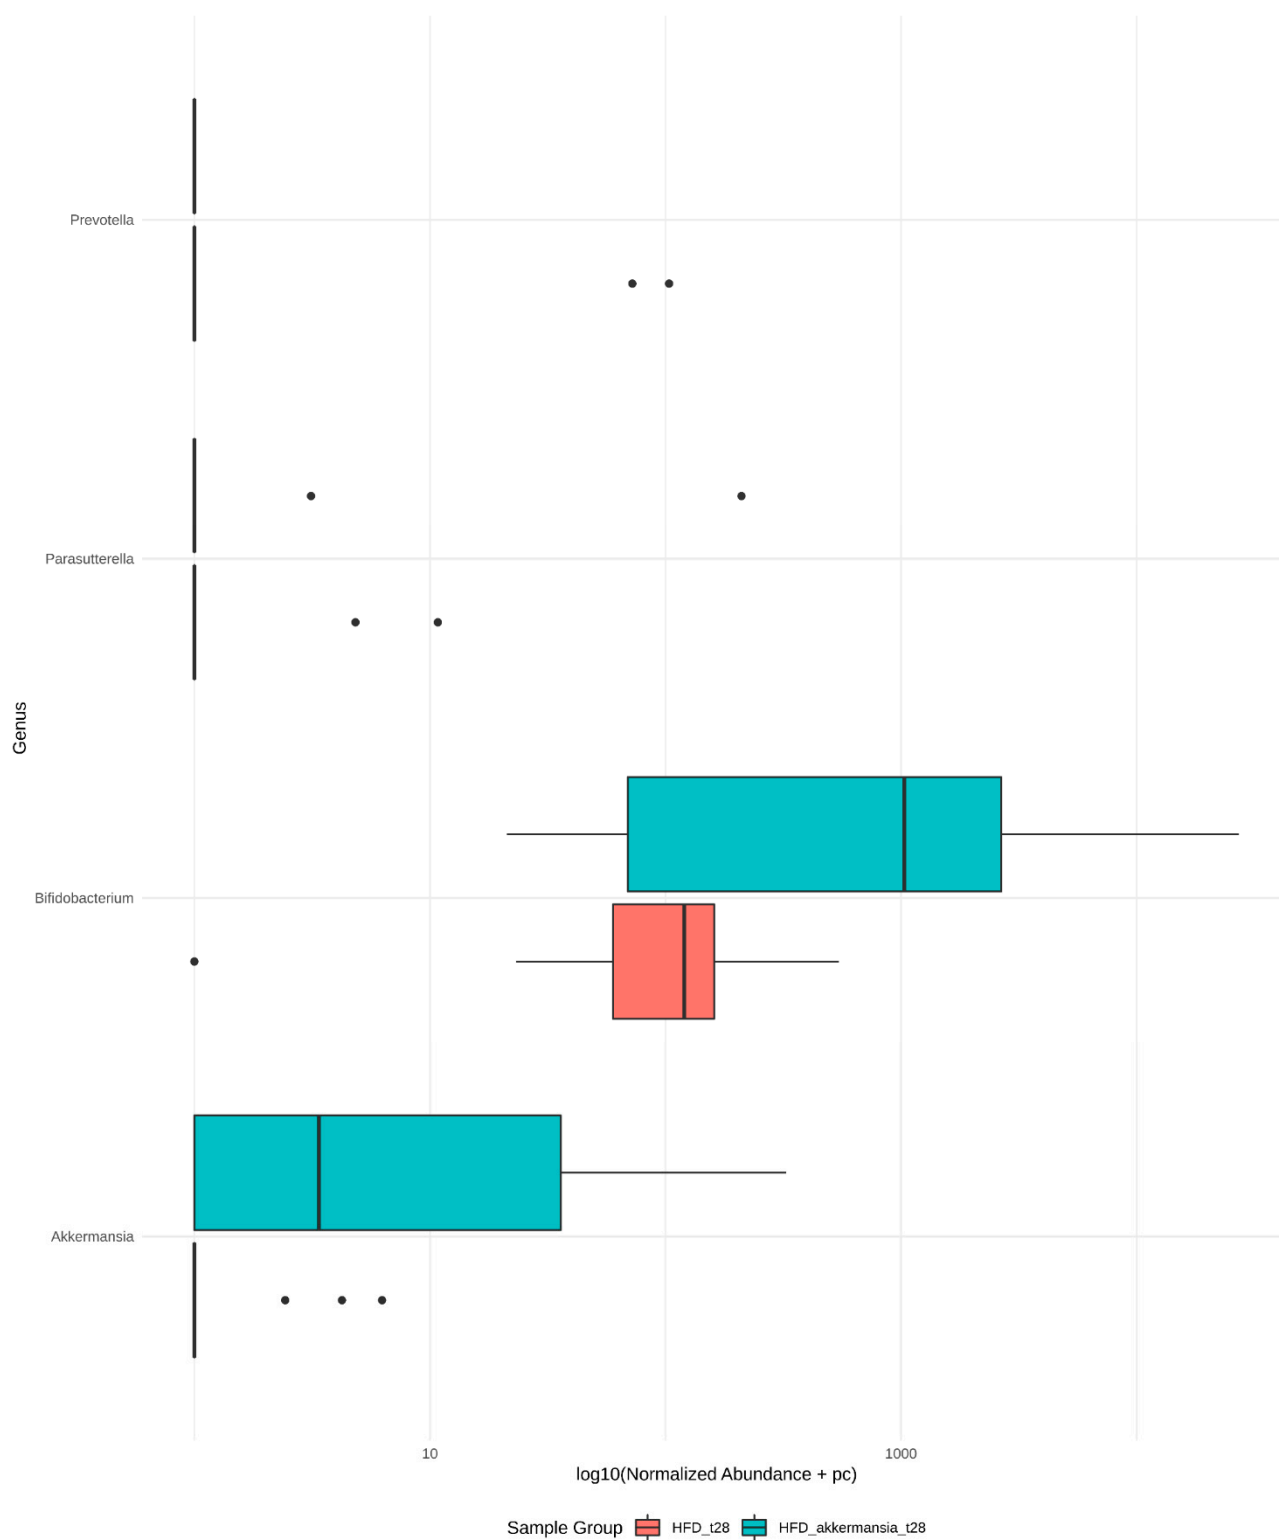

**Figure S3.** Significantly altered genera in ileum mucosa in HFD + Akk vs. HFD. *Ldlr*<sup>-/-</sup>.Leiden mice were fed a NASH-inducing high-fat diet without (HFD) or with supplementation of heat-inactivated *A. muciniphila* (HFD + Akk) for 28 weeks. Graph shows the abundance of genera that were significantly altered by treatment with heat-inactivated *A. muciniphila* relative to HFD controls.

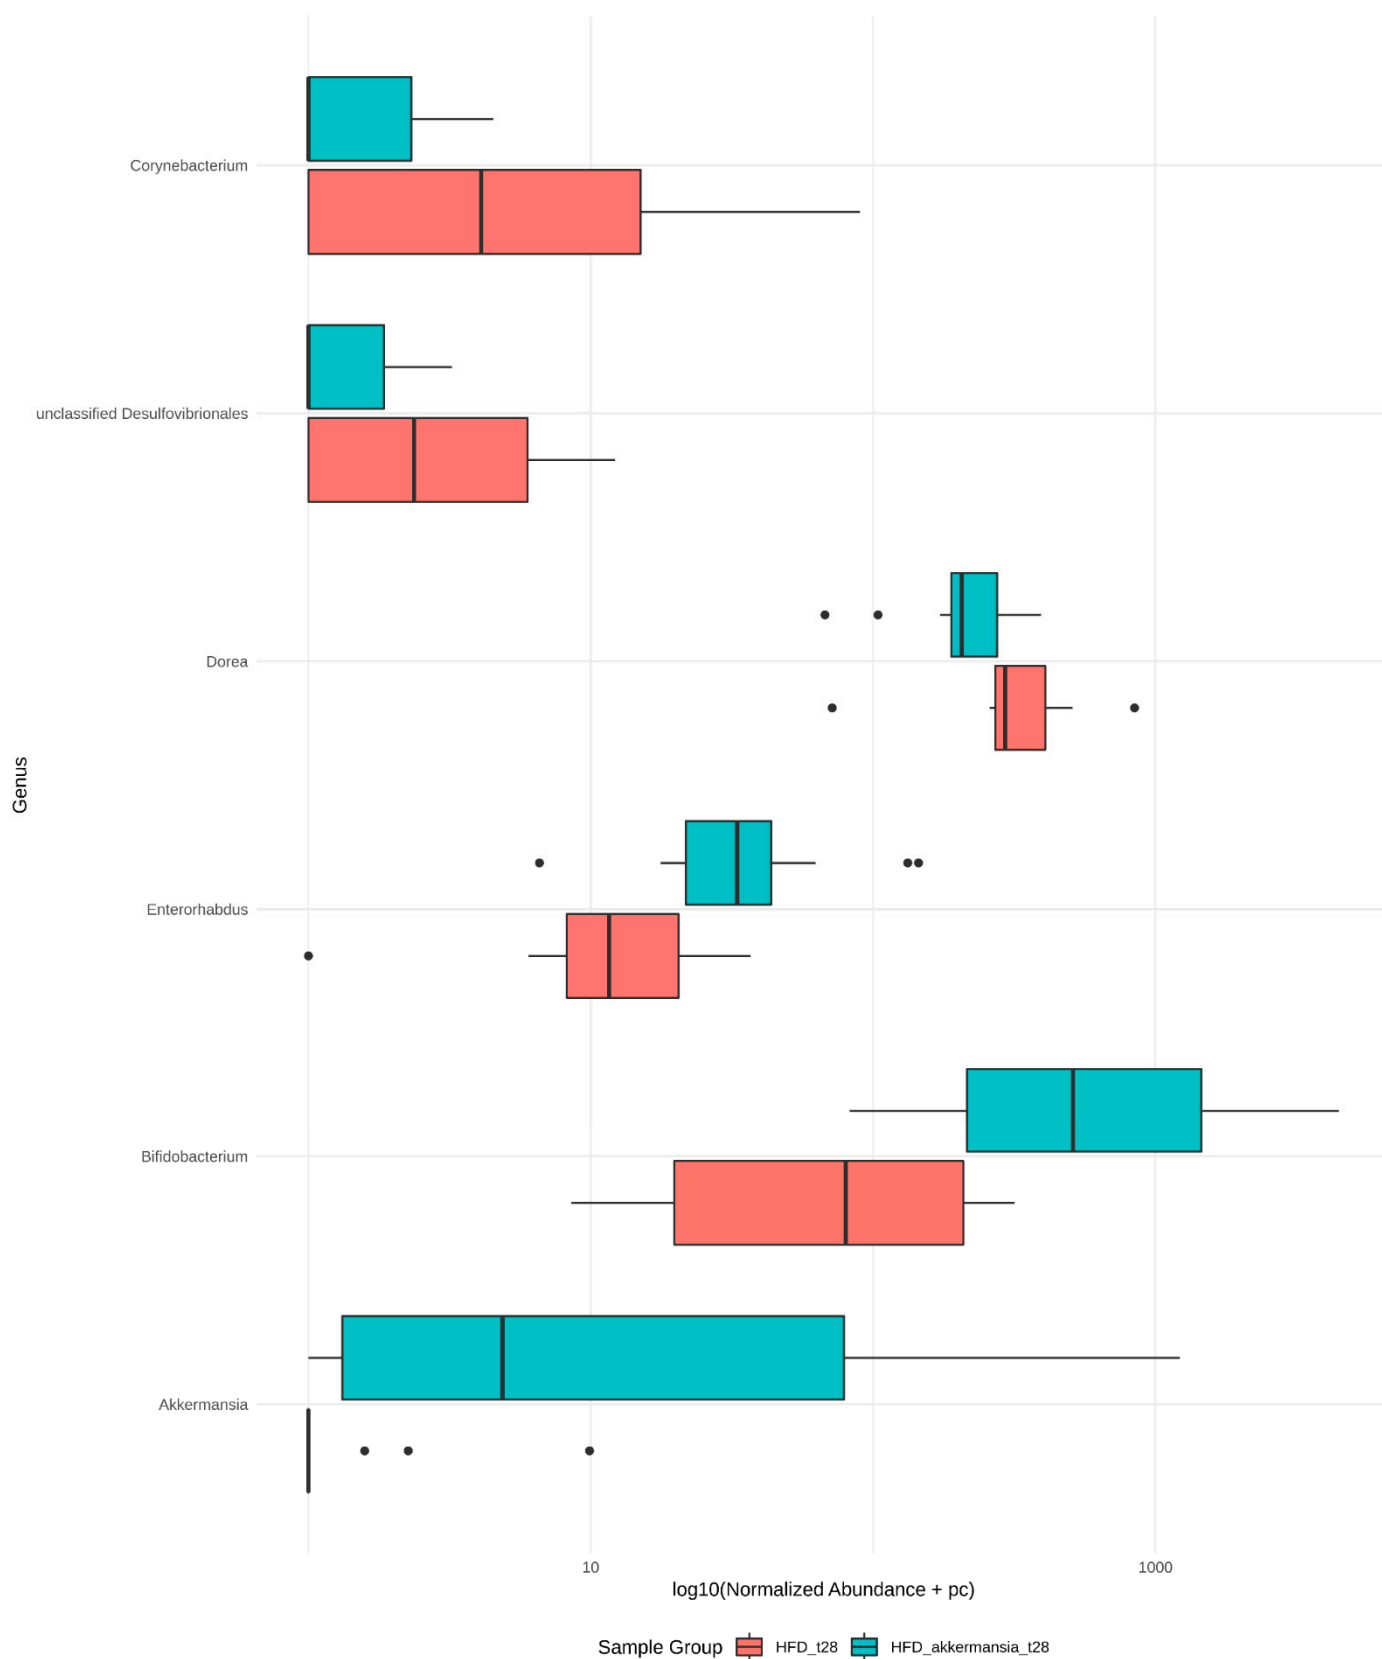

**Figure S4.** Significantly altered genera in colon mucosa in HFD + Akk vs. HFD. *Ldlr*<sup>-/-</sup>Leiden mice were fed a NASH-inducing high-fat diet without (HFD) or with supplementation of heat-inactivated *A. muciniphila* (HFD + Akk) for 28 weeks. Graph shows the abundance of genera that were significantly altered by treatment with heat-inactivated *A. muciniphila* relative to HFD controls.
